# Supplementary material for: Resveratrol Alleviates the KCl Salinity Stress of Malus hupenensis Rhed. Seedlings by Regulating K+/Na+ Homeostasis, Osmotic Adjustment, and Reactive Oxygen Species Scavenging
Source: Research Square preprint supplement (doi:10.21203/rs.3.rs-148384/v1), 2021-01-21
Supplement: Supplementary file 1 [file 6573649c79de62a9523d696f.docx]

**Supporting information**

Resveratrol alleviates the KCl salinity stress of *Malus hupenensis* Rhed. seedlings by regulating K+/Na+ homeostasis, osmotic adjustment, and Reactive Oxygen Species scavenging

Authors: Tingting Lia,b,1, Yuqi Lia,b,1, Zhijuan Sunc, Xiangli Xia,b, Guangli Shad, Changqing Maa,b, Yike Tiana,b, Caihong Wanga,b, Xiaodong Zhenga,b,*

aCollege of Horticulture, Qingdao Agricultural University, Qingdao 266109, China

bQingdao Key Laboratory of Genetic Improvement and Breeding in Horticulture Plants, Qingdao 266109, China

cCollege of Life Science, Qingdao Agricultural University, Qingdao 266109, China

dQingdao Academy of Agricultrual Science, Qingdao 266109, China

1 These authors contributed equally to this work.

****Corresponding author***

*Name:* Xiaodong Zheng

*Address:* No. 700 Changcheng Road, Qingdao Agricultural University, Qingdao 266109, China

*Email:* zheng.xiao.d@163.com

*Tel/Fax:* +86 0532 58950740 *Mobile:* +86-13305429068


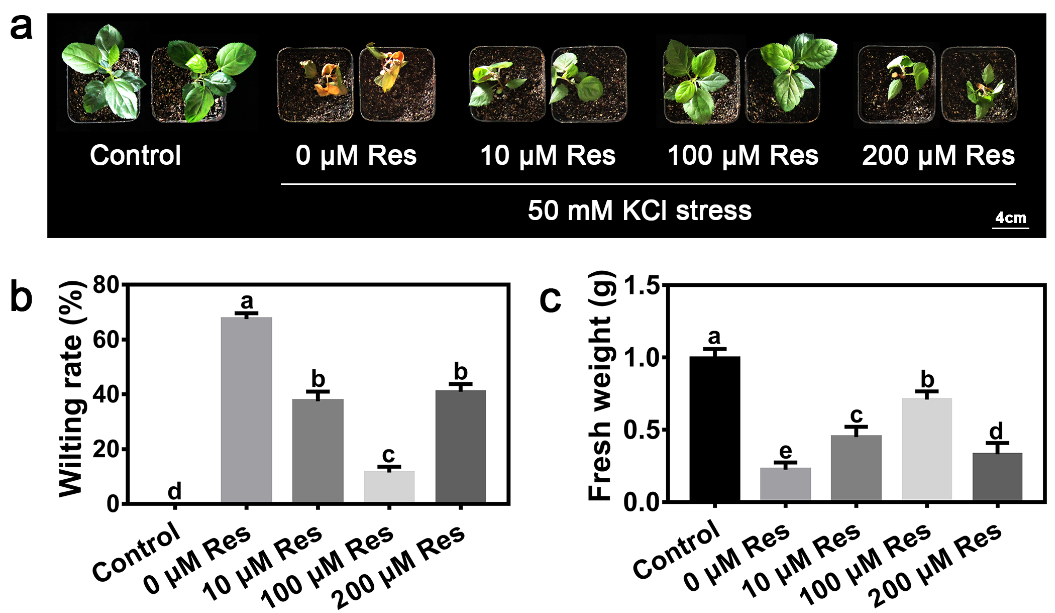


**Figure S1** Phenotypes of *M. hupehensis* seedlings treated with 50 mM KCl stress and exogenous different concentrations of Res (0 μM, 10 μM, 100 μM, and 200 μM) after KCl stress for 15 days. Effect of different concentrations of Res on wilting rate (b) and fresh weight (c) of apple seedlings after KCl stress for 15 days. The data represent the mean ± SD of biological replicates. Different lowercase letters indicate significant differences, according to Fisher’s LSD (*P* <0.05).

**Table S1** The primers used for qRT-PCR

| Primer name | Forward primer | Reverse primer |
| --- | --- | --- |
| qMhSKOR | CATCCTGACAACTGGTGGTATCG | AAGTACCTCAGAGCAATCCGTTT |
| qMhHAK5 | TTAATTTGAGTGTGTGAGAAGTGGCT | CTGTGAAATGGCGTGACTCG |
| qMhKAT1 | CTTTACCTCTCCTTTTGTTCCCTAC | GCAACAGTGTCCATTTGGTATTC |
| qMhTPK1 | GTCCACCGCAAATCCAGACTA | GAAGAGGCATGTCGTCGTAAAC |
| qMhNHX1 | TTCTGCGTGAACTTTAGACCCT | AAGACTGAGATTTCCTTTCAAGC |
| qMhNHX2 | CCACATTGATTCCAGTATTGCTT | CTCTTGAACTCTCCGTCACATTG |
| qMhCAX5 | AATGTAGACCAAATAACAGGGAGG | CTGCTCTTGTTGTCGTCGTTGT |
| qMhCHX15 | ATGGTTCAATAGTATGTTACGCTCC | GAATTTATCACTCTTTCCAAGCACC |
| qMhSOS1 | TACACTGTCGCTCTGCTCATCC | CCAGTCGTAAGGGAAAGTGAGC |
| qMhGPX6 | TTCCGAGAGTAAATCAATCCACG | AGGCAAACTCTACAATCTCGTCA |
| qMhPER65 | GGCATTCTATTCCCATTCCCTT | GAGTTGGAAGCGATGAGGAGG |
| qMhpoxN1 | GCTCCTCCAAATCATTGTTACTG | AAGAAGGACAGAAGCATCACAAC |
| qMhERF017 | ATGTCAAACCACTTCTCCAAAATCT | GGAAATTAAACTTGGCGGTGC |
| qMhMYB39 | AATGGGAATTGATCCTGTCACC | TGAGGTTGGATTTGGGGGTT |
| qMhWRKY28 | ATCAGGAACCGAAAGACCTTTACTA | ATCGCCTTCAATAGACGAAAATAGT |
| qMhMAPK3 | GCTACATGGGACATGACATTACTA | CCAAGATGTTCCTGCCTTTTAT |
| qMhANP2 | AGCATTTAGCCATTCAGGCATAC | GCAAAAAAGACGAGCTGGAGAG |
| qMhGK | ACTCTGTTTGTGAAGGTTCGGTCTA | ACAAGATTACTGAGCTTTCCAGTGT |
| ACTIN1 | CTTCAATGTGCCTGCCATGTAT | AATTTCCCGTTCAGCAGTAGTG |
